# Supplementary material for: Vibrational overtone induced elimination reactions within hydrogen-bonded molecular clusters: the dynamics of water catalyzed reactions in CH2FOH·(H2O)n
Source: Royal Society of Chemistry journal article supplement (doi:10.1039/b705264b), 2007-01-01
Supplement: b705264b.pdf [file b705264b.pdf]

SUPPLEMENTARY INFORMATION  
FOR

Vibrational Overtone Induced Elimination  
Reactions Within Hydrogen-Bonded Molecular  
Clusters: The Dynamics of Water Catalyzed  
Reactions in  $\text{CH}_2\text{FOH}\cdot(\text{H}_2\text{O})_n$

Kaito Takahashi,<sup>a</sup> Zeb C. Kramer,<sup>a</sup> Veronica Vaida,<sup>a,b</sup> and Rex T. Skodje<sup>a</sup>

*a) Department of Chemistry and Biochemistry, University of Colorado, Boulder, CO  
80309-0215*

*b) CIRES, University of Colorado, Boulder, CO 80309*

**Table S1.** The calculated equilibrium (EQ) and transition state (TS) geometries of  $CH_2FOH$  using B3LYP/6-31+G(d,p) given in Cartesian coordinates in units of angstrom.

|   |        | EQ     |        |
|---|--------|--------|--------|
| C | 0.000  | 0.000  | 0.000  |
| O | 0.000  | 0.000  | 1.380  |
| F | 1.312  | 0.000  | -0.502 |
| H | -0.482 | -0.885 | -0.431 |
| H | -0.475 | 0.926  | -0.327 |
| H | 0.330  | -0.849 | 1.706  |
|   |        | TS     |        |
| C | 0.000  | 0.000  | 0.000  |
| O | 0.000  | 0.000  | 1.288  |
| F | 1.823  | 0.000  | 0.075  |
| H | -0.153 | -0.933 | -0.556 |
| H | -0.152 | 0.933  | -0.556 |
| H | 1.202  | 0.001  | 1.119  |

**Table S2.** The calculated equilibrium (EQ) and transition state (TS) geometries of  $CH_2FOH \cdots (H_2O)$  using B3LYP/6-31+G(d,p) given in Cartesian coordinates in units of angstrom.

|   |        | EQ     |        |
|---|--------|--------|--------|
| C | 0.000  | 0.000  | 0.000  |
| O | 0.000  | 0.000  | 1.367  |
| F | 1.341  | 0.000  | -0.504 |
| H | -0.457 | -0.892 | -0.443 |
| H | -0.460 | 0.924  | -0.353 |
| H | 0.382  | -0.847 | 1.670  |
| O | 1.672  | -2.241 | 1.275  |
| H | 2.325  | -2.664 | 1.845  |
| H | 2.162  | -1.719 | 0.621  |

|   |        | TS     |        |
|---|--------|--------|--------|
| C | 0.000  | 0.000  | 0.000  |
| O | 0.000  | 0.000  | 1.267  |
| F | 1.818  | 0.000  | -0.488 |
| H | -0.124 | -0.934 | -0.558 |
| H | -0.265 | 0.922  | -0.523 |
| H | 0.973  | -0.744 | 1.634  |
| O | 2.041  | -1.177 | 1.529  |
| H | 2.643  | -0.828 | 2.199  |
| H | 2.178  | -0.670 | 0.561  |

**Table S3.** The calculated equilibrium (EQ) and transition state (TS) geometries of  $CH_2FOH \cdots (H_2O)_2$  using B3LYP/6-31+G(d,p) given in Cartesian coordinates in units of angstrom.

|   |        | EQ     |        |
|---|--------|--------|--------|
| C | 0.000  | 0.000  | 0.000  |
| O | 1.263  | 0.000  | -0.485 |
| F | 0.000  | 0.000  | 1.457  |
| H | -0.583 | 0.890  | -0.258 |
| H | -0.503 | -0.929 | -0.270 |
| H | 1.648  | 0.908  | -0.426 |
| O | 2.151  | 2.539  | -0.025 |
| H | 3.062  | 2.789  | -0.217 |
| H | 2.036  | 2.576  | 0.952  |
| O | 1.486  | 2.099  | 2.586  |
| H | 0.962  | 2.650  | 3.180  |
| H | 0.953  | 1.305  | 2.395  |
|   |        | TS     |        |
| C | 0.000  | 0.000  | 0.000  |
| O | 1.187  | 0.000  | -0.419 |
| F | 0.000  | 0.000  | 1.886  |
| H | -0.585 | 0.926  | 0.015  |
| H | -0.564 | -0.934 | -0.027 |
| H | 1.876  | 1.084  | -0.140 |

|   |       |       |       |
|---|-------|-------|-------|
| O | 2.415 | 1.954 | 0.318 |
| H | 3.367 | 1.866 | 0.177 |
| H | 2.103 | 1.870 | 1.472 |
| O | 1.629 | 1.600 | 2.558 |
| H | 1.233 | 2.350 | 3.020 |
| H | 0.865 | 0.851 | 2.340 |

**Table S4.** The calculated equilibrium (EQ) and transition state (TS) geometries of  $CH_2FOH \cdots (H_2O)_3$  using B3LYP/6-31+G(d,p) given in Cartesian coordinates in units of angstrom.

|   |        | EQ     |        |
|---|--------|--------|--------|
| C | 0.000  | 0.000  | 0.000  |
| O | 1.004  | -0.762 | -0.485 |
| F | 0.000  | 0.000  | 1.459  |
| H | 0.076  | 1.062  | -0.256 |
| H | -0.965 | -0.435 | -0.262 |
| H | 1.848  | -0.245 | -0.511 |
| O | 3.209  | 0.768  | -0.438 |
| H | 3.817  | 0.910  | -1.172 |
| H | 3.749  | 0.634  | 0.381  |
| O | 4.404  | 0.345  | 1.952  |
| H | 4.952  | -0.436 | 2.095  |
| H | 3.615  | 0.240  | 2.535  |
| O | 2.082  | 0.000  | 3.340  |
| H | 1.789  | 0.620  | 4.018  |
| H | 1.351  | -0.068 | 2.697  |
|   |        | TS     |        |
| C | 0.000  | 0.000  | 0.000  |
| O | 0.985  | -0.637 | -0.452 |
| F | 0.000  | 0.000  | 1.861  |
| H | 0.001  | 1.097  | 0.005  |
| H | -0.981 | -0.481 | -0.004 |
| H | 2.198  | -0.050 | -0.479 |
| O | 3.217  | 0.345  | -0.404 |

|   |       |        |        |
|---|-------|--------|--------|
| H | 3.314 | 1.174  | -0.887 |
| H | 3.650 | 0.328  | 0.795  |
| O | 3.965 | 0.258  | 1.889  |
| H | 4.566 | -0.489 | 2.015  |
| H | 3.043 | 0.147  | 2.554  |
| O | 1.973 | 0.000  | 3.230  |
| H | 1.839 | 0.648  | 3.932  |
| H | 1.095 | -0.026 | 2.625  |

**Table S5.** The calculated equilibrium (EQ) and transition state (TS) geometries of  $CH_2FOH \cdots (H_2O)_2 H_2O$  using B3LYP/6-31+G(d,p) given in Cartesian coordinates in units of angstrom.

|   |        |        |        |
|---|--------|--------|--------|
|   |        | EQ     |        |
| C | 0.000  | 0.000  | 0.000  |
| O | 1.263  | 0.000  | -0.490 |
| F | 0.000  | 0.000  | 1.449  |
| H | -0.583 | 0.890  | -0.262 |
| H | -0.504 | -0.927 | -0.276 |
| H | 1.650  | 0.908  | -0.423 |
| O | 2.157  | 2.535  | -0.041 |
| H | 3.102  | 2.710  | -0.130 |
| H | 1.940  | 2.601  | 0.924  |
| O | 1.333  | 2.315  | 2.511  |
| H | 0.751  | 2.954  | 2.964  |
| H | 0.830  | 1.489  | 2.409  |
| O | -0.305 | 4.206  | 3.862  |
| H | -0.038 | 4.465  | 4.753  |
| H | -0.593 | 5.013  | 3.416  |
|   |        | TS     |        |
| C | 0.000  | 0.000  | 0.000  |
| O | 1.189  | 0.000  | -0.436 |
| F | 0.000  | 0.000  | 1.801  |
| H | -0.593 | 0.923  | -0.030 |
| H | -0.570 | -0.931 | -0.060 |

|   |        |       |        |
|---|--------|-------|--------|
| H | 1.883  | 1.095 | -0.174 |
| O | 2.429  | 1.967 | 0.260  |
| H | 3.370  | 1.897 | 0.055  |
| H | 2.156  | 1.838 | 1.480  |
| O | 1.733  | 1.549 | 2.524  |
| H | 1.336  | 2.301 | 3.016  |
| H | 0.985  | 0.847 | 2.307  |
| O | 0.541  | 3.573 | 3.985  |
| H | -0.390 | 3.748 | 3.792  |
| H | 0.611  | 3.495 | 4.945  |

**Table S6.** The calculated harmonic frequencies in  $cm^{-1}$  of the equilibrium (EQ) and transition state (TS) geometries of  $CH_2FOH$  using B3LYP/6-31+G(d,p) .

|  |         |        |        |
|--|---------|--------|--------|
|  | EQ      |        |        |
|  | 395.2   | 533.7  | 974.2  |
|  | 1061.1  | 1142.5 | 1253.8 |
|  | 1382.9  | 1441.8 | 1530.2 |
|  | 3053.0  | 3152.5 | 3814.3 |
|  | TS      |        |        |
|  | 1696.2i | 402.5  | 543.3  |
|  | 656.2   | 907.3  | 1216.6 |
|  | 1261.9  | 1419.2 | 1599.1 |
|  | 1949.2  | 3035.8 | 3128.3 |

**Table S7.** The calculated harmonic frequencies in  $cm^{-1}$  of the equilibrium (EQ) and transition state (TS) geometries of  $CH_2FOH \cdots (H_2O)_1$  using B3LYP/6-31+G(d,p).

|  |        |        |        |
|--|--------|--------|--------|
|  | EQ     |        |        |
|  | 98.2   | 113.4  | 193.7  |
|  | 199.1  | 316.1  | 406.0  |
|  | 516.1  | 726.6  | 897.5  |
|  | 1097.5 | 1176.8 | 1257.8 |
|  | 1418.8 | 1468.5 | 1529.6 |
|  | 1610.3 | 3058.9 | 3157.1 |
|  | 3642.9 | 3773.4 | 3913.9 |

|         | TS     |        |
|---------|--------|--------|
| 1043.7i | 152.3  | 371.2  |
| 466.7   | 521.0  | 596.1  |
| 626.2   | 664.2  | 832.8  |
| 1203.6  | 1232.8 | 1248.3 |
| 1428.3  | 1456.3 | 1591.8 |
| 1652.8  | 1781.7 | 2067.6 |
| 3058.8  | 3157.9 | 3847.2 |

**Table S8.** The calculated harmonic frequencies in  $cm^{-1}$  of the equilibrium (EQ) and transition state (TS) geometries of  $CH_2FOH \cdots (H_2O)_2$  using B3LYP/6-31+G(d,p).

|        | EQ     |        |
|--------|--------|--------|
| 41.3   | 94.5   | 119.5  |
| 183.2  | 212.1  | 234.0  |
| 248.4  | 297.1  | 353.2  |
| 453.0  | 512.2  | 623.4  |
| 765.5  | 834.6  | 950.3  |
| 1110.2 | 1214.3 | 1268.4 |
| 1417.4 | 1515.2 | 1529.9 |
| 1629.4 | 1653.4 | 3062.9 |
| 3161.2 | 3397.2 | 3514.9 |
| 3686.3 | 3889.6 | 3898.8 |
|        | TS     |        |
| 998.0i | 70.5   | 136.6  |
| 150.7  | 297.1  | 408.6  |
| 446.3  | 497.1  | 525.2  |
| 606.1  | 623.0  | 716.9  |
| 738.1  | 846.5  | 1184.9 |
| 1219.5 | 1244.7 | 1299.2 |
| 1469.5 | 1508.1 | 1539.6 |
| 1616.7 | 1697.2 | 1764.3 |
| 1839.3 | 1985.0 | 3052.1 |
| 3157.9 | 3856.5 | 3867.6 |

**Table S9.** The calculated harmonic frequencies in  $cm^{-1}$  of the equilibrium (EQ) and transition state (TS) geometries of  $CH_2FOH\cdots(H_2O)_3$  using B3LYP/6-31+G(d,p).

|  | EQ     |        |        |
|--|--------|--------|--------|
|  | 27.3   | 40.0   | 70.0   |
|  | 83.6   | 124.2  | 173.1  |
|  | 209.2  | 218.9  | 222.9  |
|  | 258.6  | 294.1  | 309.2  |
|  | 361.0  | 438.3  | 497.1  |
|  | 559.7  | 600.0  | 811.2  |
|  | 836.1  | 904.4  | 987.6  |
|  | 1106.1 | 1220.0 | 1270.2 |
|  | 1418.8 | 1492.2 | 1528.9 |
|  | 1642.3 | 1660.5 | 1689.5 |
|  | 3068.0 | 3157.7 | 3320.0 |
|  | 3402.9 | 3463.0 | 3681.7 |
|  | 3884.9 | 3893.5 | 3898.6 |
|  | TS     |        |        |
|  | 829.3i | 25.3   | 56.0   |
|  | 93.7   | 125.7  | 148.0  |
|  | 262.0  | 330.1  | 360.4  |
|  | 408.8  | 456.2  | 495.5  |
|  | 557.6  | 567.6  | 640.7  |
|  | 690.1  | 736.1  | 799.2  |
|  | 862.6  | 1127.9 | 1220.1 |
|  | 1224.1 | 1265.2 | 1425.8 |
|  | 1471.3 | 1490.2 | 1525.9 |
|  | 1611.8 | 1629.2 | 1711.9 |
|  | 1734.6 | 1779.3 | 1907.5 |
|  | 2238.4 | 3033.6 | 3138.8 |
|  | 3854.2 | 3874.2 | 3883.3 |

**Table S10.** The calculated harmonic frequencies in  $cm^{-1}$  of the equilibrium (EQ) and transition state (TS) geometries of  $CH_2FOH\cdots(H_2O)_2H_2O$  using B3LYP/6-31+G(d,p).

|        | EQ     |        |
|--------|--------|--------|
| 22.4   | 40.8   | 48.4   |
| 83.8   | 92.7   | 119.8  |
| 154.3  | 188.4  | 207.8  |
| 229.7  | 240.3  | 286.1  |
| 328.9  | 459.0  | 488.7  |
| 524.7  | 608.1  | 727.7  |
| 821.9  | 857.3  | 1008.1 |
| 1114.1 | 1209.5 | 1271.5 |
| 1419.9 | 1525.1 | 1529.5 |
| 1616.8 | 1643.6 | 1669.3 |
| 3054.9 | 3151.7 | 3333.2 |
| 3420.7 | 3661.1 | 3775.6 |
| 3812.8 | 3887.0 | 3929.5 |
|        | TS     |        |
| 820.3i | 37.3   | 48.7   |
| 71.0   | 77.6   | 129.9  |
| 143.2  | 215.6  | 283.5  |
| 307.5  | 336.6  | 421.1  |
| 458.0  | 520.0  | 558.8  |
| 677.9  | 789.3  | 799.7  |
| 859.8  | 916.7  | 1131.6 |
| 1241.4 | 1252.4 | 1294.0 |
| 1451.9 | 1488.6 | 1557.4 |
| 1622.3 | 1642.0 | 1730.1 |
| 1792.4 | 1850.4 | 2469.1 |
| 3028.3 | 3130.3 | 3536.8 |
| 3808.1 | 3865.0 | 3921.9 |
